**Title:** Cardiovascular Outcomes of Alpha-Blockers Versus 5-Alpha Reductase Inhibitors Among Patients with Benign Prostatic Hyperplasia

**Authors:** Jiandong Zhang<sup>1\*#</sup>, Chase Doyne Latour<sup>2\*</sup>, Oluwasolape Olawore<sup>2</sup>, Virginia Pate<sup>2</sup>, David F. Friedlander, Til Stürmer<sup>2,4</sup>, Michele Jonsson Funk<sup>2</sup>, Brian C. Jensen<sup>1#</sup>

\*These authors contributed equally to this work.

**Affiliation:**

<sup>1</sup> UNC Division of Cardiology, UNC Department of Pharmacology, UNC McAllister Heart Institute (if space permits)

<sup>2</sup> Department of Epidemiology, Gillings School of Global Public Health, University of North Carolina at Chapel Hill, Chapel Hill, NC, USA

<sup>3</sup> Department of Urology, University of North Carolina, Chapel Hill, NC, USA

<sup>4</sup> Lineberger Comprehensive Cancer Center, University of North Carolina at Chapel Hill, Chapel Hill, NC, USA

**Article Type:** [Brief Report](#)

(1197 words, 15 references, 1 figure, 2 tables)

**#Co-Corresponding Author:**

Jiandong Zhang M.D. & Ph.D.

UNC Division of Cardiology  
UNC McAllister Heart Institute  
160 Dental Circle, CB 7075  
Chapel Hill, NC 27599-7075  
Email: [jdzhang@email.unc.edu](mailto:jdzhang@email.unc.edu)  
Tel:919-966-5201

Brian C. Jensen M.D.

UNC Division of Cardiology  
UNC McAllister Heart Institute

160 Dental Circle, CB 7075  
Chapel Hill, NC 27599-7075

Email: [brian\\_jensen@med.unc.edu](mailto:brian_jensen@med.unc.edu)

Tel:919-966-5201

### **Conflicts of Interest:**

CDL has received funding from Target RWE and Amgen, Inc. for unrelated studies. TS receives salary support as Director of Comparative Effectiveness Research (CER), NC TraCS Institute, UNC Clinical and Translational Science Award (UL1TR002489), the Center for Pharmacoepidemiology (current members: GlaxoSmithKline, UCB BioSciences, Takeda, AbbVie, Boehringer Ingelheim), from pharmaceutical companies (Novo Nordisk), and from a generous contribution from Dr. Nancy A. Dreyer to the Department of Epidemiology, University of North Carolina at Chapel Hill. Dr. Stürmer does not accept personal compensation of any kind from any pharmaceutical company. He owns stock in Novartis, Roche, and Novo Nordisk. BCJ is an inventor on patent US 11,213,514 “Alpha-1-adrenergic receptor agonist therapy.” Abbvie, Astellas, Boehringer Ingelheim, GlaxoSmithKline (GSK), Takeda, Sarepta, and UCB Bioscience have collaborative agreements with the Center for Pharmacoepidemiology housed in the Department of Epidemiology which provides salary support to MJF. MJF is a member of the Scientific Steering Committee (SSC) of a post-approval safety study of an unrelated drug class funded by GSK. All compensation for services provided on the SSC is invoiced by and paid to UNC Chapel Hill. MJF is a member of the Epidemiology and Clinical Advisory Board for EpiVidian. JZ, OO, VP, and DFF have no potential conflicts of interest to report.

### **Funding:**

This research was partially supported by a National Research Service Award Pre-Doctoral/Post-Doctoral Traineeship from the Agency for Healthcare Research and Quality sponsored by The Cecil G. Sheps Center for Health Services Research, The University of North Carolina at Chapel Hill, Grant No. T32-HS000032 (CDL). TS receives investigator-initiated research funding and support as Principal Investigator (R01AG056479) from the National Institute on Aging (NIA), and as Co-Investigator (R01CA174453, R01HL118255, R01MD011680), National Institutes of Health (NIH). BCJ receives funding as Principal Investigator (2R01HL140067) and as Co-investigator (R01HL161456, R01HL148432, R01HL146701) from the National Institutes of Health.

### **Data Sharing Statement**

These data are not publicly available but can be obtained from the Centers for Medicare and Medicaid Services through an appropriate data use agreement and sufficient funds to cover the cost of the data access. SAS code files are posted in a public repository on GitHub (<https://github.com/chasedlatour/AB-v-5ARI-Medicare>).

## **Abstract:**

**Importance:** Alpha-blockers (AB) are widely prescribed for treatment of benign prostatic hyperplasia (BPH). However, the cardiovascular safety profile of these medications among patients with BPH is not well understood.

**Objective:** To compare the safety of ABs versus 5-alpha reductase inhibitors (5ARIs) for risk of adverse cardiovascular outcomes.

**Design:** We conducted an active comparator, new user, cohort study using insurance claims data from 2007-2019.

**Setting:** This study used data from a 20% random sample of Medicare (U.S.) beneficiaries.

**Participants:** Men between 66 and 90 years of age were indexed into the cohort at new use of an AB or 5ARI. We required 12 months of continuous enrollment and  $\geq 1$  diagnosis code for BPH within 12 months prior to initiation.

**Exposures:** Exposure was defined by a qualifying prescription fill for either an AB or 5ARI after at least 12 months without a prescription for these drug classes.

**Main Outcomes and Measures:** Follow-up began at a qualified refill for the study drug. The primary study outcomes were (1) hospitalization for heart failure (HF); (2) composite major adverse cardiovascular events (MACE) (hospitalization for stroke, myocardial infarction, or death); (3) composite MACE or hospitalization for HF; and (4) death. We estimated inverse probability of treatment and censoring weighted 1-year risks, risk ratios (RRs), and risk differences (RDs) for each outcome.

**Results:** We identified 163,846 and 26,040 initiators of ABs and 5ARIs, respectively. In our fully adjusted analyses, we found ABs, compared to 5ARIs, were associated with an increased 1-year risk of MACE (RR=1.08 [1.02, 1.13], RD=6.26 per 1,000 [2.15, 10.37]), composite MACE

and HF (RR=1.07 [1.03, 1.12], RD=7.40 per 1,000 [2.88, 11.93]), and death (RR=1.07 [1.01, 1.14], RD=3.85 per 1,000 [0.40, 7.29]). We did not find a difference in risk for HF alone (RR=0.99 [0.92, 1.07], RD=-2.33 per 10,000 [-31.97, 27.31]).

**Conclusions and Relevance:** These results provide real-world evidence that ABs may be associated with an increased risk of adverse cardiovascular outcomes, though residual confounding may explain these findings. If replicated with detailed confounder data, these results could have important public health implications given the widespread use of these medications.

### **Three Key Points:**

**Question:** What is the comparative risk of alpha-blockers versus 5-alpha reductase inhibitors for adverse cardiovascular outcomes among patients with benign prostatic hyperplasia?

**Findings:** We found that use of alpha-blockers was associated with a small increase in risk for multiple adverse cardiovascular outcomes compared to 5-alpha reductase inhibitors, among patients with benign prostatic hyperplasia. These results could be explained by unmeasured variables (e.g., blood pressure or body mass index).

**Meaning:** First-line use of alpha-blockers for BPH may result in a small increase in risk of adverse cardiovascular outcomes including death. Widescale use of alpha-blockers (>5 million prescriptions/year) could amplify this risk.

## **Introduction:**

Cardiovascular diseases (CVD) and benign prostatic hyperplasia (BPH) are common conditions with shared risk factors among older men.<sup>1</sup> Alpha-1 blockers (ABs), particularly selective antagonists of the alpha-1A adrenergic receptor subtype, are the most commonly prescribed class of medications for BPH.<sup>2</sup> Interestingly, the alpha-1A adrenergic receptor subtype is expressed in both prostate and cardiovascular tissues. Preclinical studies have demonstrated that the alpha-1A adrenergic receptor subtype confers cardioprotective effects.<sup>3,4</sup> However, previous investigations of the cardiac safety profile of ABs among patients with BPH have produced conflicting results.<sup>3,5</sup>

Recently, we found that use of ABs, compared with no AB use, was associated with increased mortality among patients undergoing percutaneous coronary intervention (PCI) for myocardial infarction (MI).<sup>6</sup> This finding highlights the need to investigate AB safety in real-world data. In this study, we hypothesized that ABs would be associated with increased cardiovascular risks among patients with BPH compared to 5-alpha-reductase inhibitors (5ARIs), the second most prescribed medication class for BPH.<sup>2</sup>

## **Methods:**

This study used insurance claims data from a 20% random sample of Medicare beneficiaries in the U.S. from 2007-2019 from the Centers for Medicare and Medicaid Services. Analyses were approved by the UNC's Institutional Review Board.

We used an active comparator, new user design to compare new users of ABs versus 5ARIs for risk of adverse outcomes.<sup>7</sup> We constructed a retrospective cohort of men who were 66-90 years of age at new use. We required continuous enrollment in fee-for-service Medicare plans A, B, and D for  $\geq 12$  months (allowed 45-day gap) and  $\geq 1$  diagnosis code for BPH  $\leq 12$

months prior to this first prescription fill. We applied comorbidity-related exclusion criteria (**Methods S1**). Treatment with ABs (subtype selective and non-selective) and 5ARIs was identified using prescription claims (**Supplement1**). We defined new users as individuals without recorded use of either drug  $\leq 12$  months prior to initiation and required a refill (allowed 30-day gap). We excluded individuals who filled a prescription for the other drug class or experienced an outcome before the second fill (**Figure S1**).

Our primary outcomes were (1) hospitalization for heart failure (HF); (2) composite major adverse cardiovascular events (MACE) (hospitalization for stroke, MI, or death); (3) composite MACE or in-patient hospitalization for HF; and (4) death. Secondary outcomes were (1) PCI and (2) coronary artery bypass graft surgery (CABG) (**Figures S2-S4**). Confounders are described in **Methods S2 (Figure S5, Table S1)**.

We conducted an intention-to-treat (ITT) analysis. We estimated cumulative incidence, risk ratios (RRs), and risk differences (RDs) from the second prescription fill through 1-year of follow-up, using Kaplan-Meier and Aalen-Johansen (HF, revascularization) estimators. Point estimates and confidence intervals were calculated using non-parametric bootstrapping (**Methods S3**); cumulative incidence curves were plotted without bootstrapping. We addressed confounding and censoring using stabilized inverse probability of treatment and censoring weights (IPTW, IPCW)<sup>8,9</sup> (**Table S1**). **Table S2** describes multiple sensitivity analyses.

## **Results:**

We identified 163,846 and 26,040 initiators of ABs and 5ARIs, respectively (**Table 1, Figure S6**). Tamsulosin was most used (**Figure S7, Table S3**). Treatment discontinuation, switching, and/or augmentation was common (>60%) by 1 year (**Figure S8, Table S4**). Initiators of ABs, compared to 5ARIs, were demographically similar in the unweighted cohort. However,

AB initiators had modestly higher prevalence of some CVD risk factors (e.g., prior HF hospitalization: 7.4% vs. 5.5%) whereas 5ARI initiators were older (**Table 1**). Patients were well-balanced on measured covariates after IPTW (**Figures S9 and S10, Table S5**).

The fully adjusted RR and RD (ABs versus 5ARIs) for hospitalization for HF was 0.99 (95% CI: 0.92, 1.07) and -2.33 per 10,000 (95% CI: -31.97, 27.31), respectively (**Figure 1; Table 2**). For MACE, the RR and RD were 1.08 (1.02, 1.13) and 6.26 per 1,000 (95% CI: 2.15, 10.37), respectively. For composite MACE or HF hospitalization, the RR was 1.07 (95% CI: 1.03, 1.12), and the RD was 7.40 per 1,000 (95% CI: 2.88, 11.93). Finally, for mortality, RR and RD estimates were 1.07 (95% CI: 1.01, 1.14) and 3.85 per 1,000 (95% CI: 0.40, 7.29), respectively. Results were similar for secondary outcomes (PCI: RR=1.18 [95% CI: 1.01, 1.38], RD=1.57 per 1,000 [95% CI: 0.15, 2.99]; CABG: RR=1.06 [95% CI: 0.86, 1.31], RD=2.57 per 10,000 [95% CI: -6.98, 12.11]). Results were consistent across sensitivity analyses (**Tables S6-S12, Figure S11**).

## Discussion

This study of Medicare beneficiaries with BPH found that initiation of ABs, compared to 5ARIs, was associated with a small but significant increased risk of death, MACE, composite MACE and HF, and revascularization procedures. We did not find an increased risk of hospitalization for HF alone.

To our knowledge, this is the largest study of cardiovascular risk associated with ABs versus 5ARIs among patients with BPH and the first to find AB use associated with higher risk of mortality and MACE. In the landmark ALLHAT trial of antihypertensives, the non-selective AB treatment arm (doxazosin) was terminated early due to increased risk of adverse cardiac events, most notably HF<sup>10</sup>. Our study provides important evidence for contemporary practice.



ABs are now used almost exclusively to treat BPH rather than hypertension<sup>5</sup>. We found very similar results when we limited to subtype selective ABs in sensitivity analyses (**Table S7**), unsurprising given that 86% of ABs prescribed in our study were selective.

Our study found a similar risk of HF hospitalization between AB and 5ARI initiators. This finding appears to contrast with ALLHAT and a 2021 study by Lusty et al., that reported a RR of 1.10 for HF among users of ABs compared to 5ARIs.<sup>11</sup> However, that study focused on newdiagnoses of HF, whereas we studied hospitalization due to HF. Additionally, Lusty et al. indexed patients into their study at BPH diagnosis, inducing potential selection bias compared to our approach.<sup>7,12</sup> Our results further contrast with Sousa et al. who found that ABs increased risk of acute HF in randomized trials among patients with indications for ABs (OR=1.78 [95% CI [1.46-2.16)]), but they found no effect on mortality (OR=1.10 [95% CI: 0.84, 1.42]).<sup>13</sup>

This study has important strengths. We conducted prespecified analyses, employing rigorous methodology including a new user, active comparator design with an ITT analysis, IPTW, and ICPW. Further, our choice of active comparator is clinically relevant: both ABs and 5ARIs are first-line treatments for BPH, but adverse cardiac outcomes are only hypothesized with ABs.<sup>3</sup>

Importantly, unmeasured or poorly measured variables (e.g., blood pressure, body mass index) may introduce residual confounding in our analysis.<sup>14</sup> However, even a small effect of ABs versus 5ARIs on cardiovascular outcomes would have important implications for public health because ABs are prescribed widely (demonstrated here). Per our RD estimate, for every 135 (95% CI: 84, 347) individuals with BPH treated with ABs over 5ARIs, we would expect 1 additional MACE or hospitalization for HF (i.e., number needed to harm) within 1 year after initiation. For perspective, 86% (163,836 individuals) of our 20% Medicare sample was

prescribed ABs instead of 5ARIs (i.e., 1214 additional events) and >5 million people filled a prescription for tamsulosin alone in the U.S in 2020.<sup>15</sup>

## **Conclusions**

We found new prescription of ABs, associated with a slightly higher risk of all-cause mortality and MACE, compared to 5ARIs, among patients with BPH, though residual confounding by unmeasured variables may explain these results. Further investigation with detailed clinical data on strong risk factors for CVD is warranted.

## References

1. Awedew AF, Han H, Abbasi B, et al. The global, regional, and national burden of benign prostatic hyperplasia in 204 countries and territories from 2000 to 2019: a systematic analysis for the Global Burden of Disease Study 2019. *Lancet Healthy Longev.* 2022;3(11):e754-e776. doi:10.1016/S2666-7568(22)00213-6
2. Beduschi MC, Beduschi R, Oesterling JE. Alpha-blockade therapy for benign prostatic hyperplasia: From a nonselective to a more selective alpha1A-adrenergic antagonist. *Urology.* 1998;51(6):861-872. doi:10.1016/S0090-4295(98)00140-X
3. Zhang J, Simpson PC, Jensen BC. Cardiac  $\alpha$ 1A-adrenergic receptors: Emerging protective roles in cardiovascular diseases. *Am J Physiol Heart Circ Physiol.* 2021;320(2):H725-H733. doi:10.1152/AJPHEART.00621.2020
4. Schwinn DA, Roehrborn CG.  $\alpha$ 1-Adrenoceptor subtypes and lower urinary tract symptoms. *International Journal of Urology.* 2008;15(3):193-199. doi:10.1111/j.1442-2042.2007.01956.x
5. Nickel JC, Sander S, Moon TD. A meta-analysis of the vascular-related safety profile and efficacy of  $\alpha$ -adrenergic blockers for symptoms related to benign prostatic hyperplasia. *Int J Clin Pract.* 2008;62(10):1547-1559. doi:10.1111/j.1742-1241.2008.01880.x
6. Zhang J, Yang H, Ortiz F, et al. ALPHA-BLOCKER USE AND CLINICAL OUTCOMES FOLLOWING PERCUTANEOUS CORONARY INTERVENTION. *J Am Coll Cardiol.* 2021;77(18\_Supplement\_1):135. doi:10.1016/S0735-1097(21)01494-7
7. Lund JL, Richardson DB, Stürmer T. The Active Comparator, New User Study Design in Pharmacoepidemiology: Historical Foundations and Contemporary Application. *Curr Epidemiol Rep.* 2015;2(4):221-228. doi:10.1007/s40471-015-0053-5
8. Brookhart MA, Wyss R, Layton JB, Stürmer T. Propensity Score Methods for Confounding Control in Non-Experimental Research. *Circ Cardiovasc Qual Outcomes.* 2013;6(5):604-611. doi:10.1161/CIRCOUTCOMES.113.000359
9. Howe CJ, Cole SR, Lau B, Napravnik S, Eron JJ. Selection Bias Due to Loss to Follow Up in Cohort Studies. *Epidemiology.* 2016;27(1):91-97. doi:10.1097/EDE.0000000000000409
10. The ALLHAT Officers and Coordinators for the ALLHAT Collaborative Research Group. Major Outcomes in High-Risk Hypertensive Patients Randomized to Angiotensin-Converting Enzyme Inhibitor or Calcium Channel Blocker vs Diuretic: The Antihypertensive and Lipid-Lowering Treatment to Prevent Heart Attack Trial (ALLHAT). *JAMA.* 2002;288(23):2981-2997. doi:10.1001/jama.288.23.2981
11. Lusty A, Siemens DR, Tohidi M, Whitehead M, Tranmer J, Nickel JC. Cardiac Failure Associated with Medical Therapy of Benign Prostatic Hyperplasia: A Population Based Study. *J Urol.* 2021;205(5):1430-1437. doi:10.1097/JU.0000000000001561
12. Suissa S, Dell'Aniello S. Time-related biases in pharmacoepidemiology. *Pharmacoepidemiol Drug Saf.* 2020;29(9):1101-1110. doi:10.1002/pds.5083

13. Sousa JP, Mendonça D, Teixeira R, Gonçalves L. Do adrenergic alpha-antagonists increase the risk of poor cardiovascular outcomes? A systematic review and meta-analysis. *ESC Heart Fail.* 2022;9(5):2823-2839. doi:10.1002/ehf2.14012
14. Jackevicius CA, Ghaznavi Z, Lu L, Warner AL. Safety of Alpha-Adrenergic Receptor Antagonists in Heart Failure. *JACC Heart Fail.* 2018;6(11):917-925. doi:10.1016/j.jchf.2018.06.015
15. Agency for Healthcare Research and Quality. Medical Expenditure Panel Survey (MEPS) Household Component (HC). Published 2020. Accessed May 11, 2023. <https://datatools.ahrq.gov/meps-hc?type=tab&tab=mepshcpd>

## Figure Titles

**Figure 1.** Cumulative incidence curves for primary outcomes: (a) hospitalization for heart failure (HF), (b) major adverse cardiovascular events (MACE) outcomes, (c) composite MACE or hospitalization for HF, and (d) all-cause mortality.

## Tables

**Table 1.** Distribution of covariates at treatment initiation in the primary cohort after trimming non-overlapping regions of the propensity score distributions across the two treatment groups. Results are presented before and after applying inverse probability of treatment weights (IPTW).

| Covariate                              | Unweighted Cohort            |                                            |       | IPTW Cohort                  |                                            |       |
|----------------------------------------|------------------------------|--------------------------------------------|-------|------------------------------|--------------------------------------------|-------|
|                                        | $\alpha$ -Blocker Initiators | 5 $\alpha$ -Reductase Inhibitor Initiators | SMD   | $\alpha$ -Blocker Initiators | 5 $\alpha$ -Reductase Inhibitor Initiators | SMD   |
|                                        | (N = 163,829)                | (N = 26,039)                               |       | (N = 163,840)                | (N = 26,009)                               |       |
| Years of Age, Median (IQR)             | 73.0 (69.0-79.0)             | 74.0 (70.0-80.0)                           | 0.117 | 74.0 (69.0-79.0)             | 74.0 (69.0-79.0)                           | 0.016 |
| Calendar Year, Median (IQR)            | 2014.0 (2011.0-2017.0)       | 2013.0 (2010.0-2016.0)                     | 0.344 | 2014.0 (2011.0-2017.0)       | 2014.0 (2011.0-2017.0)                     | 0.004 |
| Race/Ethnicity <sup>a</sup>            |                              |                                            | 0.072 |                              |                                            | 0.041 |
| Unknown                                | 2,189 (1.3%)                 | 286 (1.1%)                                 |       | 2,135 (1.3%)                 | 334 (1.3%)                                 |       |
| Non-Hispanic, White                    | 133,510 (81.5%)              | 21,605 (83.0%)                             |       | 133,835 (81.7%)              | 21,119 (81.2%)                             |       |
| Black or African American              | 9,179 (5.6%)                 | 1,339 (5.1%)                               |       | 9,087 (5.5%)                 | 1,501 (5.8%)                               |       |
| Other Asian/Pacific Islander           | 1,872 (1.1%)                 | 250 (1.0%)                                 |       | 1,831 (1.1%)                 | 296 (1.1%)                                 |       |
| Hispanic American Indian/Alaska Native | 5,890 (3.6%)                 | 827 (3.2%)                                 |       | 5,799 (3.5%)                 | 945 (3.6%)                                 |       |
|                                        | 10,610 (6.5%)                | 1,656 (6.4%)                               |       | 10,586 (6.5%)                | 1,714 (6.6%)                               |       |
| Acute Urinary Retention                | 36,514 (22.3%)               | 4,574 (17.6%)                              | 0.118 | 35,447 (21.6%)               | 5,604 (21.5%)                              | 0.002 |
| Coronary Heart Disease                 | 67,225 (41.0%)               | 10,443 (40.1%)                             | 0.019 | 67,033 (40.9%)               | 10,700 (41.1%)                             | 0.005 |

|                                      |                 |                |       |                 |                |       |
|--------------------------------------|-----------------|----------------|-------|-----------------|----------------|-------|
| Hospitalization due to Heart Failure | 12,051 (7.4%)   | 1,439 (5.5%)   | 0.075 | 11,651 (7.1%)   | 1,910 (7.3%)   | 0.009 |
| Chronic Kidney Disease               | 48,123 (29.4%)  | 6,208 (23.8%)  | 0.125 | 46,894 (28.6%)  | 7,523 (28.9%)  | 0.007 |
| COPD                                 | 39,662 (24.2%)  | 5,385 (20.7%)  | 0.085 | 38,883 (23.7%)  | 6,232 (24.0%)  | 0.005 |
| Hypercholesterolemia                 | 81,013 (49.4%)  | 14,971 (57.5%) | 0.162 | 82,833 (50.6%)  | 13,162 (50.6%) | 0.001 |
| Hospitalization due to MI            | 3,339 (2.0%)    | 427 (1.6%)     | 0.030 | 3,254 (2.0%)    | 535 (2.1%)     | 0.005 |
| Hospitalization due to Stroke        | 5,595 (3.4%)    | 612 (2.4%)     | 0.064 | 5,360 (3.3%)    | 882 (3.4%)     | 0.007 |
| Percutaneous Coronary Intervention   | 2,817 (1.7%)    | 437 (1.7%)     | 0.003 | 2,812 (1.7%)    | 466 (1.8%)     | 0.006 |
| Coronary Artery Bypass Surgery       | 1,664 (1.0%)    | 152 (0.6%)     | 0.049 | 1,566 (1.0%)    | 245 (0.9%)     | 0.001 |
| Tobacco Use                          | 30,344 (18.5%)  | 3,671 (14.1%)  | 0.120 | 29,353 (17.9%)  | 4,656 (17.9%)  | 0.000 |
| ACE Inhibitor, Any Use               | 61,533 (37.6%)  | 9,258 (35.6%)  | 0.042 | 61,084 (37.3%)  | 9,691 (37.3%)  | 0.000 |
| ARB, Any Use                         | 33,951 (20.7%)  | 5,072 (19.5%)  | 0.031 | 33,674 (20.6%)  | 5,376 (20.7%)  | 0.003 |
| Beta-Blocker, Any Use                | 74,043 (45.2%)  | 10,993 (42.2%) | 0.060 | 73,379 (44.8%)  | 11,664 (44.8%) | 0.001 |
| Peripheral Vasodilators, Any Use     | 3,029 (1.8%)    | 609 (2.3%)     | 0.034 | 3,142 (1.9%)    | 511 (2.0%)     | 0.003 |
| Calcium Channel Blocker, Any use     | 49,928 (30.5%)  | 6,877 (26.4%)  | 0.090 | 49,018 (29.9%)  | 7,780 (29.9%)  | 0.000 |
| Thiazide Diuretics, Any Use          | 34,827 (21.3%)  | 5,250 (20.2%)  | 0.027 | 34,580 (21.1%)  | 5,431 (20.9%)  | 0.006 |
| Combination Diuretics, Any Use       | 18,052 (11.0%)  | 2,920 (11.2%)  | 0.006 | 18,093 (11.0%)  | 2,837 (10.9%)  | 0.004 |
| Potassium Sparing Diuretic, Any Use  | 9,191 (5.6%)    | 1,391 (5.3%)   | 0.012 | 9,137 (5.6%)    | 1,473 (5.7%)   | 0.004 |
| Loop Diuretic, Any Use               | 25,547 (15.6%)  | 3,593 (13.8%)  | 0.051 | 25,162 (15.4%)  | 4,070 (15.6%)  | 0.008 |
| Other Diuretics, Any Use             | 3,517 (2.1%)    | 453 (1.7%)     | 0.029 | 3,424 (2.1%)    | 544 (2.1%)     | 0.000 |
| Anticoagulant Use                    |                 |                | 0.086 |                 |                | 0.000 |
| No Fill                              | 141,194 (86.2%) | 22,111 (84.9%) |       | 140,905 (86.0%) | 22,329 (85.9%) |       |
| 1 Fill                               | 4,223 (2.6%)    | 532 (2.0%)     |       | 4,104 (2.5%)    | 652 (2.5%)     |       |
| ≥2 Fills                             | 18,412 (11.2%)  | 3,396 (13.0%)  |       | 18,831 (11.5%)  | 3,027 (11.6%)  |       |
| Opioid Use                           |                 |                | 0.158 |                 |                | 0.000 |
| No Fill                              | 97,222 (59.3%)  | 17,178 (66.0%) |       | 98,722 (60.3%)  | 15,672 (60.3%) |       |
| 1 Fill                               | 26,625          | 3,958          |       | 26,384          | 4,172          |       |

|                                                      |                    |                   |       |                    |                   |       |
|------------------------------------------------------|--------------------|-------------------|-------|--------------------|-------------------|-------|
|                                                      | (16.3%)            | (15.2%)           |       | (16.1%)            | (16.0%)           |       |
| ≥2 Fills                                             | 39,982<br>(24.4%)  | 4,903<br>(18.8%)  |       | 38,734<br>(23.6%)  | 6,165<br>(23.7%)  |       |
| Nicotine or<br>Varenicline, Any<br>Use               | 758 (0.5%)         | 106 (0.4%)        | 0.008 | 746 (0.5%)         | 121 (0.5%)        | 0.001 |
| Statin, Any Use                                      | 96,595<br>(59.0%)  | 14,652<br>(56.3%) | 0.054 | 95,986<br>(58.6%)  | 15,193<br>(58.4%) | 0.003 |
| Diabetes                                             | 54,347<br>(33.2%)  | 7,530<br>(28.9%)  | 0.092 | 53,401<br>(32.6%)  | 8,536<br>(32.8%)  | 0.005 |
| DPP-4i                                               | 6,876 (4.2%)       | 840 (3.2%)        | 0.051 | 6,656 (4.1%)       | 1,051 (4.0%)      | 0.001 |
| GLP-1                                                | 1,626 (1.0%)       | 164 (0.6%)        | 0.040 | 1,545 (0.9%)       | 251 (1.0%)        | 0.002 |
| Long-Acting<br>Insulin                               |                    |                   | 0.092 |                    |                   | 0.000 |
| No Fill                                              | 151,982<br>(92.8%) | 24,626<br>(94.6%) |       | 152,394<br>(93.0%) | 24,158<br>(92.9%) |       |
| 1 Fill                                               | 1,666 (1.0%)       | 183 (0.7%)        |       | 1,596 (1.0%)       | 252 (1.0%)        |       |
| ≥2 Fills                                             | 10,181<br>(6.2%)   | 1,230 (4.7%)      |       | 9,850 (6.0%)       | 1,599 (6.1%)      |       |
| Short-Acting<br>Insulin                              |                    |                   | 0.064 |                    |                   | 0.000 |
| No Fill                                              | 157,738<br>(96.3%) | 25,320<br>(97.2%) |       | 157,961<br>(96.4%) | 25,048<br>(96.3%) |       |
| 1 Fill                                               | 1,713 (1.0%)       | 186 (0.7%)        |       | 1,639 (1.0%)       | 263 (1.0%)        |       |
| ≥2 Fills                                             | 4,378 (2.7%)       | 533 (2.0%)        |       | 4,240 (2.6%)       | 697 (2.7%)        |       |
| SGLT-2i, Any Fill                                    | 1,144 (0.7%)       | 108 (0.4%)        | 0.038 | 1,080 (0.7%)       | 175 (0.7%)        | 0.002 |
| Sulfonylureas, Any<br>Fill                           | 18,053<br>(11.0%)  | 2,366 (9.1%)      | 0.064 | 17,619<br>(10.8%)  | 2,793<br>(10.7%)  | 0.000 |
| TZD, Any Fill                                        | 4,952 (3.0%)       | 784 (3.0%)        | 0.001 | 4,949 (3.0%)       | 789 (3.0%)        | 0.001 |
| Atherosclerosis or<br>Peripheral<br>Vascular Disease | 45,604<br>(27.8%)  | 8,020<br>(30.8%)  | 0.065 | 46,286<br>(28.3%)  | 7,414<br>(28.5%)  | 0.006 |
| Obesity                                              | 18,951<br>(11.6%)  | 1,941 (7.5%)      | 0.141 | 18,029<br>(11.0%)  | 2,897<br>(11.1%)  | 0.004 |

SMD = Absolute standardized mean difference; IQR = Inter-quartile range.

Patients who experienced a heart failure or major adverse cardiovascular event between their first and second prescription fill are included.

**Table 2.** Treatment effect estimates for the primary and secondary outcomes, among the primary study population after trimming non-overlapping regions of the propensity score distributions, comparing initiators of  $\alpha$ -Blockers versus  $5\alpha$ -reductase inhibitors. Results are presented with and without inverse probability of treatment weighting (IPTW).

| Study Outcome                            | Non-IPTW Estimates                                    |                                                                    |                                    |                        | IPTW Estimates                          |                                            |                                     |                        |
|------------------------------------------|-------------------------------------------------------|--------------------------------------------------------------------|------------------------------------|------------------------|-----------------------------------------|--------------------------------------------|-------------------------------------|------------------------|
|                                          | Risk Among $\alpha$ -Blocker Initiators<br>% (95% CI) | Risk Among $5\alpha$ -Reductase Inhibitor Initiators<br>% (95% CI) | Risk Difference<br>(95% CI)        | Risk Ratio<br>(95% CI) | Risk Among $\alpha$ -Blocker Initiators | Risk Among $5\alpha$ -Reductase Inhibitors | Risk Difference<br>(95% CI)         | Risk Ratio<br>(95% CI) |
| Primary Outcomes                         |                                                       |                                                                    |                                    |                        |                                         |                                            |                                     |                        |
| Hospitalization for HF                   | 3.90<br>(3.80, 4.00)                                  | 3.29<br>(3.07, 3.52)                                               | 60.16 per 10,000<br>(35.07, 85.25) | 1.18<br>(1.10, 1.27)   | 3.83<br>(3.74, 3.93)                    | 3.86<br>(3.58, 4.14)                       | -2.33 per 10,000<br>(-31.97, 27.31) | 0.99<br>(0.92, 1.07)   |
| MACE Outcomes                            | 9.07<br>(8.93, 9.21)                                  | 7.38<br>(7.04, 7.72)                                               | 16.90 per 1,000<br>(13.31, 20.50)  | 1.23<br>(1.17, 1.29)   | 8.95<br>(8.81, 9.09)                    | 8.32<br>(7.92, 8.72)                       | 6.26 per 1,000<br>(2.15, 10.37)     | 1.08<br>(1.02, 1.13)   |
| Composite MACE or Hospitalization for HF | 11.30<br>(11.14, 11.45)                               | 9.26<br>(8.89, 9.63)                                               | 20.38 per 1,000<br>(16.38, 24.38)  | 1.22<br>(1.17, 1.27)   | 11.14<br>(10.99, 11.30)                 | 10.40<br>(9.97, 10.84)                     | 7.40 per 1,000<br>(2.88, 11.93)     | 1.07<br>(1.03, 1.12)   |
| Death from Any Cause                     | 6.11<br>(5.99, 6.22)                                  | 4.95<br>(4.67, 5.23)                                               | 11.54 per 1,000<br>(8.48, 14.61)   | 1.23<br>(1.16, 1.31)   | 6.03<br>(5.91, 6.14)                    | 5.64<br>(5.31, 5.97)                       | 3.85 per 1,000<br>(0.40, 7.29)      | 1.07<br>(1.01, 1.14)   |
| Secondary Outcomes                       |                                                       |                                                                    |                                    |                        |                                         |                                            |                                     |                        |
| PCI Procedure                            | 1.08<br>(1.03, 1.13)                                  | 0.71<br>(0.61, 0.81)                                               | 3.72 per 1,000<br>(2.59, 4.86)     | 1.53<br>(1.31, 1.78)   | 1.04<br>(0.99, 1.09)                    | 0.89<br>(0.75, 1.02)                       | 1.57 per 1,000<br>(0.15, 2.99)      | 1.18<br>(1.01, 1.38)   |
| CABG                                     | 0.48<br>(0.44, 0.51)                                  | 0.48<br>(0.40, 0.56)                                               | -0.46 per 10,000<br>(-9.38, 8.47)  | 0.99<br>(0.82, 1.20)   | 0.48<br>(0.44, 0.51)                    | 0.45<br>(0.37, 0.54)                       | 2.57 per 10,000<br>(-6.98, 12.11)   | 1.06<br>(0.86, 1.31)   |

HF = Heart failure; MACE = Major adverse cardiovascular events; PCI = Percutaneous coronary intervention; CABG = coronary

artery bypass graft surgery



**(a) Heart Failure (HF)**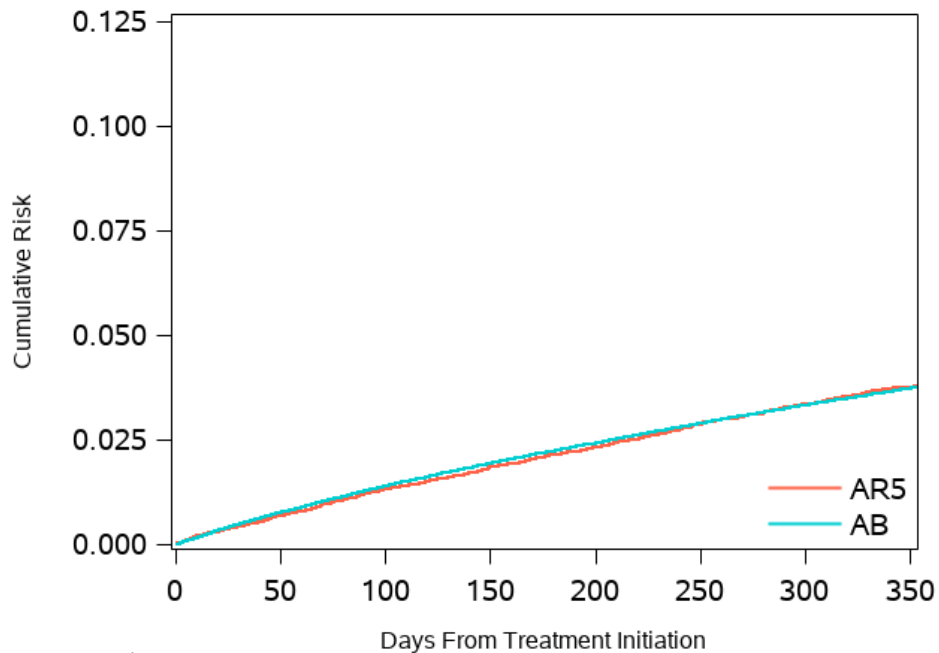

| No. At Risk |         | Days From Treatment Initiation |         |         |         |         |         |         |     |
|-------------|---------|--------------------------------|---------|---------|---------|---------|---------|---------|-----|
|             |         | 0                              | 50      | 100     | 150     | 200     | 250     | 300     | 350 |
| AR5         | 25,905  | 25,263                         | 24,640  | 24,080  | 23,482  | 22,899  | 22,370  | 21,806  |     |
| AB          | 162,588 | 156,916                        | 151,719 | 146,863 | 142,104 | 137,576 | 133,081 | 128,902 |     |

**(b) Major Adverse Cardiovascular Events (MACE)**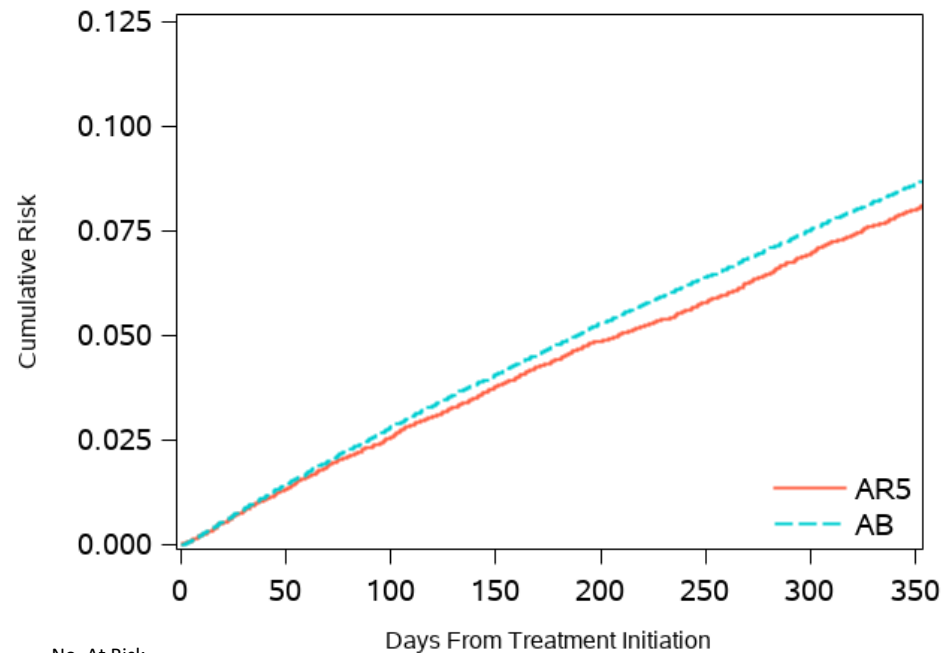

| No. At Risk |         | Days From Treatment Initiation |         |         |         |         |         |         |     |
|-------------|---------|--------------------------------|---------|---------|---------|---------|---------|---------|-----|
|             |         | 0                              | 50      | 100     | 150     | 200     | 250     | 300     | 350 |
| AR5         | 25,942  | 25,279                         | 24,673  | 24,098  | 23,487  | 22,922  | 22,379  | 21,806  |     |
| AB          | 162,908 | 157,318                        | 152,110 | 147,224 | 142,375 | 137,804 | 133,190 | 128,876 |     |

**(c) Composite MACE or HF**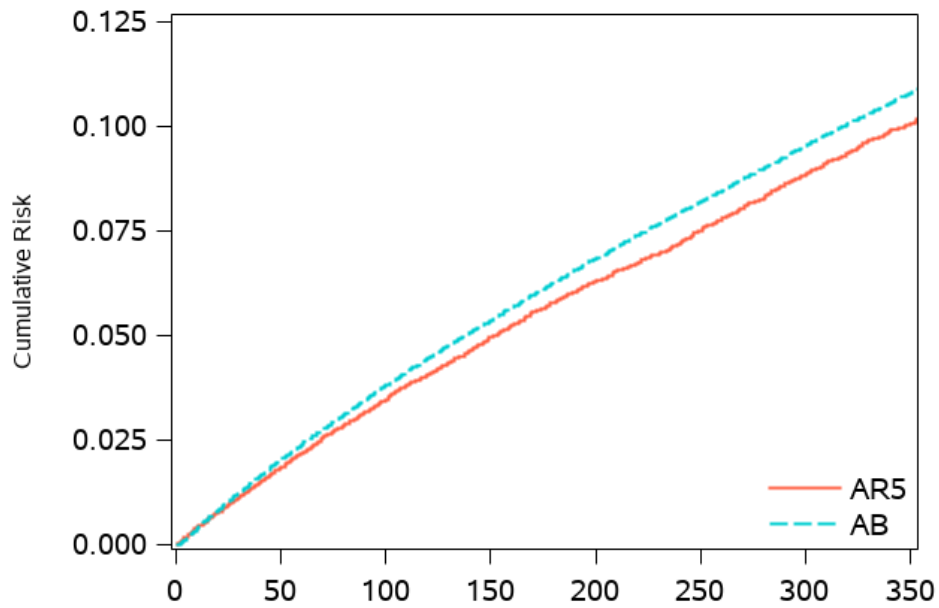

| No. At Risk |         | Days From Treatment Initiation |         |         |         |         |         |         |     |
|-------------|---------|--------------------------------|---------|---------|---------|---------|---------|---------|-----|
|             |         | 0                              | 50      | 100     | 150     | 200     | 250     | 300     | 350 |
| AR5         | 25,819  | 25,048                         | 24,362  | 23,732  | 23,076  | 22,454  | 21,876  | 21,273  |     |
| AB          | 161,753 | 155,259                        | 149,444 | 144,160 | 138,987 | 134,118 | 129,315 | 124,876 |     |

**(d) All-Cause Mortality**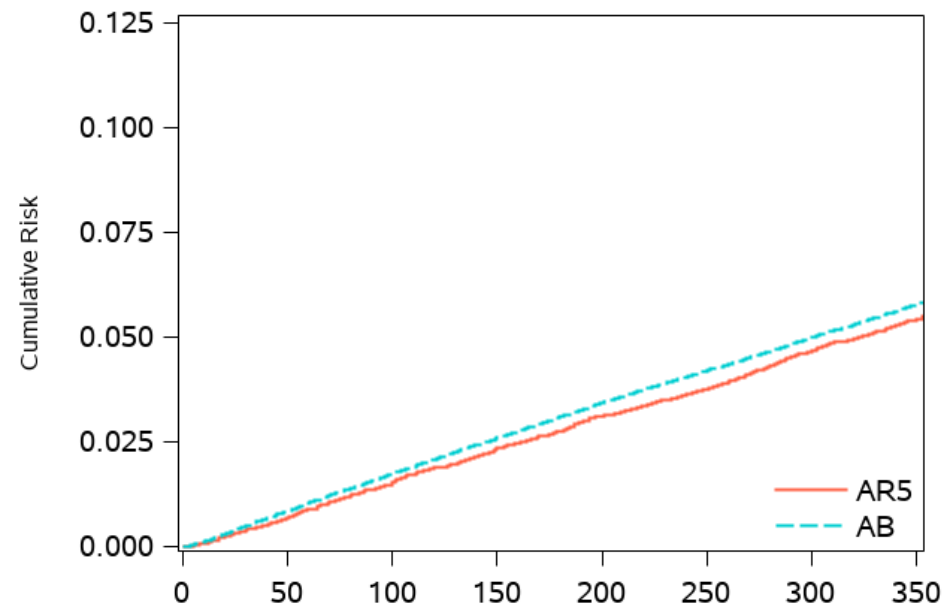

| No. At Risk |         | Days From Treatment Initiation |         |         |         |         |         |         |     |
|-------------|---------|--------------------------------|---------|---------|---------|---------|---------|---------|-----|
|             |         | 0                              | 50      | 100     | 150     | 200     | 250     | 300     | 350 |
| AR5         | 26,040  | 25,510                         | 24,992  | 24,502  | 23,957  | 23,454  | 22,969  | 22,449  |     |
| AB          | 163,846 | 159,169                        | 154,695 | 150,376 | 146,040 | 141,893 | 137,693 | 133,709 |     |
